# Supplementary material
Source: publisher site journal article supplement (https://www.dovepress.com/article/319511)
Supplement: Supplementary file 1 [file get_supplementary_file.php]

**Measuring Peak Inspiratory Flow in Patients with Chronic Obstructive Pulmonary Disease**

Jill A Ohar, Gary T Ferguson, Donald A Mahler, M Bradley Drummond, Rajiv Dhand, Roy A Pleasants, Antonio Anzueto, David MG Halpin, David B Price, Gail S Drescher, Haley M Hoy, John Haughney, Michael W Hess, Omar S Usmani

**Supplementary material**

**Supplementary methods**

**Devices that determine inhalation parameters through dry powder inhalers**

The Inhaler Compliance Assessment (INCA) device, which attaches to Diskus®, uses sound to measure peak inspiratory flow (PIF) and was used to determine that many patients with chronic obstructive pulmonary disease do not achieve adequate inspiratory flow in the home setting;1 however, the device was not commercially available as of early 2020. The Digihaler™ (Teva) has sensors integrated into Spiromax® and measures inspiratory flow and volume.2 The Respiro (Amiko) device is a digital sensor attachment that can be used to measure PIF through detection of airflow vibrations.3

**Supplementary Table 1: Variability in Measuring Techniques for PIF Using Inhalers or In-Check™ DIAL in Published Studies**

| **Study** | **How Was PIF Measured?** | **Instructions for PIF Provided?**  **(Yes/No)** | **Instructions and Methods for Measuring PIF** |
| --- | --- | --- | --- |
| **PIF Measured Using a Modified Inhaler and/or an IPR** | | | |
| Abadelah et al. 20194  Financial support: not reported | Inhalation profiles were recorded using an empty Onbrez Breezhaler® and an IPR5 | Yes | Patients were given the Breezhaler® PIL to read and were trained to **inhale as hard and fast as they could from the start of the inhalation maneuver and for as long as they could.**  Instructions for exhalation were not provided |
| Altman et al. 20185  Financial support: Novartis Pharma AG | Breezhaler®, Ellipta®, and HandiHaler® were modified at the mouthpiece with a small, stainless steel tube to connect to a custom-built, calibrated IPR pressure transducer | Yes | Patients were trained on use of each inhaler by study personnel. A standard **“Investigator’s Test Script” was used across all sites to standardize the inhalation maneuver**. Each patient was required to record 3 inhalation profiles using each inhaler. Patients were allowed to rest between successive inhalations from the same inhaler, and between inhalations from 2 different inhalers. The highest PIF value of the 3 replicate inhalations per inhaler was used for the analyses.  Instructions for exhalation were not provided |
| Anderson et al. 20216  Financial support: GlaxoSmithKline | PIF was measured by routine spirometry and electronic clinical assessments (clinical studies) and without superimposed flow resistance to simulate inhaler physics (KPNW database) | No | Patients wore a nose clip engaged with the spirometer mouthpiece and continued tidal breathing until they were relaxed. At least 3 and no more than 8 complete maximal flow volume loops were obtained for each patient, and the highest PIF measurement recorded was reported. The estimated PIF achieved through the moderate-resistance Ellipta® DPI was calculated from the measured spirometric PIF using an equation developed based on data from 2 previous studies* in patients with COPD of all severities |
| Azouz et al. 20157  Financial support: not reported | A Micro-Loop spirometer was modified so that adapters could be fitted onto the air inlet end of the spirometer. For each DPI (Aerolizer®, Diskus®, Easyhaler®, and Turbuhaler®), a specially designed adapter was used to ensure airtight seals between the adapter, the spirometer inlet, and the empty DPI | No | Inhalation flow profiles were measured by asking patients to perform their **normal (real-life) DPI inhalation**. Each patient performed 2 separate inhalations through each inhaler, and the profile with the fastest PIF was chosen for data analysis. Patients were given a 5-minute rest between the 2 separate inhalations through each inhaler.  The resistances of Aerolizer®, Diskus®, Easyhaler®, and Turbuhaler® were 0.0207, 0.0249, 0.0424, and 0.0335 (kPa)0.5(min L-1), respectively.  Note: the time when PIF occurred after starting the inhalation (Tp; in seconds) was also assessed.  Instructions for exhalation were not provided |
| Azouz et al. 20158  Financial support: Teva Pharmaceuticals | A probe was placed into the inhalation channel of each inhaler (Spiromax® and Turbuhaler®) distal from the opening of the mouthpiece. From pressure-time readings and the corresponding inhalation flow readings, PIF (L/min) and time to PIF (Tmax) were obtained | Yes | Training for each DPI was provided verbally by a highly trained researcher, with instructions as per the PIL (obtained from the manufacturers). Two consecutive inhalation maneuvers were performed with each inhaler.  Study participants then underwent enhanced training using an In-Check™ DIAL set to the resistance for Turbuhaler®. Training was provided by a highly trained researcher, who also made the inhalation maneuver measurements. Participants were shown their PIF and **encouraged to improve it by inhaling more quickly**, **particularly from the start of inhalation.**  Inhalation parameters for 2 maneuvers performed using the faster inhalation technique were measured in the same way as before enhanced training.  For each pair of maneuvers, the profile with the highest PIF was selected for analysis |
| Broeders et al.9 (2001)  Financial support: GlaxoSmithKline, Zeist, The Netherlands | Inhalation pressure profiles were recorded by a pressure transducer, measuring pressures in the mouthpiece during inhalation through Diskus® and Turbuhaler®. Inhalation profiles (including PIF) were stored on an IPR | No | Patients inhaled 3 times through each inhaler  Instructions for exhalation were not provided |
| Broeders et al.10 (2003)  Financial support: GlaxoSmithKline, Zeist, The Netherlands | Inhalation pressure profiles were recorded by a pressure transducer, measuring pressures in the mouthpiece during inhalation through Diskus® and Turbuhaler®. Inhalation profiles (including PIF) were stored on an IPR | Yes | In the first part of the study, patients inhaled through their inhaler as they would in their daily lives, without specific additional instruction. Before the second part of the study, the patients were given specific additional verbal and written instructions, according to the **manufacturer’s leaflet**. Patients inhaled 3 times through each device |
| Broeders et al.11 (2005)  Financial support: GlaxoSmithKline, Zeist, The Netherlands | The inhalation profiles including PIF were recorded by a pressure transducer, the IPR, during inhalation through a placebo Diskus® and Turbuhaler® | No | For each device, triplicate inhalation profiles were recorded |
| Cegla12 (2004)  Financial support: not reported | Flow variables were measured for Turbuhaler® and Novolizer® using a double-beam oscilloscope, spiroceptor plugged to an Ellison pressure transducer, and Keller pressure sensor | Yes | Patients received instructions according to the **Instructions for Use brochures** for both inhalers  Patients inhaled ≥2 times through each of the 2 inhalers in a random order |
| Chetta et al.13 (2021)  Financial support: Chiesi Farmaceutici SpA | The inspiratory profile through the NEXThaler® device was assessed by acoustic monitoring using a condenser microphone | Yes | Patients received the following instructions: “Hold your inhaler firmly in the upright position. Open the cover fully, and check the dose counter window.  Before inhaling, **breathe out as far as comfortable**; do not breathe out through the inhaler. Bring the inhaler up to your mouth and place your lips around the mouthpiece. Do not cover the air vent when holding the inhaler. Do not inhale through the air vent. **Take a deep and forceful**  **breath through your mouth**. On inhalation check that an audible click is heard. Remove the inhaler from your mouth. Hold your breath for 5–10 s or as long as is comfortable. Breathe out. Move the inhaler back to  the upright position and close the cover fully. Check that the counter has gone down by one.” Patients inhaled twice through a placebo NEXThaler® device, with the inhalations separated by a maximum of 5 min |
| Chodosh et al.14 (2001)  Financial support: not reported.  Some authors are employees of Boehringer Ingelheim | The SurveyTach Pneumotach with PLUS/sql software was used; the HandiHaler® was sealed in a custom coupling device | Yes | Patients were instructed on use of the HandiHaler®  PIF was first evaluated without the HandiHaler®. The patient was instructed to **inhale rapidly and deeply.** This maneuver was repeated twice with approximately 2 minutes between measurements. Next, PIF was evaluated using the HandiHaler® pneumotach interface. The patient was instructed to **(1)** **breathe out as far as possible (without the inhaler), (2) close his or her lips firmly around the mouthpiece, and (3) inhale slowly and deeply through the HandiHaler® but at a rate rapid enough to hear the capsule vibrate.** Steps 1 to 3 were repeated twice, with approximately 2 minutes between measurements. The coordinator monitored and recorded if the capsule vibration was heard independent of the patient and without the patient’s knowledge |
| Farkas et al.15 (2019)  Financial support:  Bolyai János Scholarship  of the Hungarian Academy of Sciences | Patients inhaled through a mobile handheld spirometer connected to the Breezhaler®, Genuair®, or Turbuhaler® DPIs | Yes | Patients were instructed on the use of the devices in accordance  with the PIL |
| Hira et al.16 (2018)  Financial support: Hitachi Automotive Systems, Ltd provided support in the form of salaries for authors | An inspiratory flow recorder with a pressure gauge was used to measure and visualize inspiratory flow patterns. A customized low-volume air sampler  was connected to the inhalation flow recorder via the inhalers (Breezhaler®, Clickhaler®, Diskhaler®, Diskus®, Ellipta®, HandiHaler®, Jenuair®, Swinghaler®, Turbuhaler®, Twincaps®, and Twisthaler®) or corresponding attachment orifices, which were adjusted to each inhaler by regulation of the diameter of the orifice | Yes | When participants could not achieve the criterion of optimal inhalation pattern, they received instructions for inhalation by pharmacists, and their inhalation pattern was measured again  Instructions for exhalation were not provided |
| Jõgi et al.17 (2021)  Financial support: Orion Corporation, Espoo, Finland | Easyhaler® (standard and center slot configurations) and HandiHaler® | Yes | Study patients were trained to perform the inhalations with placebo Easyhaler® inhalers and placebo capsules inhaled via HandiHaler® according to the **manufacturers’ instructions** including, for example, inhalation instructions for each inhaler. Subsequently, patients were assigned to perform 3 single inhalations from each of the 3 inhalers in a randomly assigned sequence. Inspiratory flow parameters were assessed, and each patient was then crossed over to the next inhaler |
| Magnussen et al.18 (2009)  Financial support: Almirall, Barcelona, Spain | PIF was measured using a standard spirometer connected to the Genuair® or the HandiHaler® inhalers | Yes | Patients were trained on the correct use of inhalers by written and verbal instruction. When using the Genuair® inhaler, patients were asked to **inhale as fast and hard as possible**. Inhalations through the HandiHaler® were performed according to 2 different instructions: **inhalation by a slow, deep breath**, but at a rate rapid enough to hear the capsule vibrate, as per the manufacturer's instructions, or inhalation **as fast and hard as possible**, simulating the instructions for use of the Genuair® inhaler. For each inhaler, 3 measurements per patient were recorded at 10-minute intervals |
| Malmberg et al.19 (2010)  Financial support: Unrestricted research grant from Orion Corporation, Espoo, Finland | Easyhaler® connected in series to a pneumotachograph | Yes | Patients were instructed **to exhale gently (to FRC) and then to inhale as fast and long as possible through the inhaler**. They practiced this inhalation maneuver 3 times. Thereafter, 3 PIF measurements were recorded consecutively. PIF measurements were performed in random order to compensate for the possible confounding effect of muscle fatigue |
| Malmberg et al.20 (2014)  Financial support: Orion Pharma | Inspiratory flow curves were recorded through Easyhaler® and Turbuhaler® connected to a pneumotachograph | Yes | The patient received **inhaler-specific training (according to the Instructions for Use of each inhaler**). **Instructions for Easyhaler**® **were to breathe in forcefully and deeply**. After a practice period, 3 inspiratory flow curves were recorded through the inhalers connected to a pneumotachograph in the standing position; the best of the 3 measurements was analyzed |
| Malmberg et al.21 (2021)  Financial support: Orion Pharma | Inspiratory flow was recorded through Easyhaler®, Diskus®, or Turbuhaler® connected to a pneumotachograph | Yes | Patients received standard training on the use of the inhalers (**according to instructions in the respective** **patient information leaflets**). After practicing, the PIF rate through the inhaler connected to a pneumotachograph was recorded, using a spirometer before crossing over to the second and third devices in sequence. For most patients, inspiratory flow parameters were measured in a standing position, but sitting was also permitted, if necessary (e.g., for patients using wheelchairs)  Three inspiratory flow curves were recorded, and the best measurement was analyzed |
| Negro et al.22 (2001)  Financial support: not reported.  One author is an employee of Chiesi Farmaceutici S.p.A. | Pulvinal™ and Turbohaler™ inserted into the mouthpiece of a pneumotachograph | Yes | Based on the instructions for use, patients were asked to **deeply exhale and then to inhale through the inhaler rapidly and deeply**, possibly keeping the inhaler in the vertical position. Instructions for use were given with the help of diagrams showing the correct inhalation technique |
| Pavkov et al.23 (2010)  Financial support: Novartis Pharma | An IPR was used to measure the pressure drop versus time through the Breezhaler®, and pressure drop data were used to determine PIF | Yes | **Patients were trained on correct use of the inhaler using both written and verbal instructions** provided by a respiratory nurse. The highest PIF from 3 attempts was recorded |
| Prime et al.24 (2015)  Financial support: GlaxoSmithKline | Inhaler (Ellipta®)-specific inhalation profiles were recorded using an IPR | No | All participants performed up to 3 inhalations for each resistance level/configuration (single-strip or two-strip Ellipta®) with sufficient time allowed between inhalations to ensure they were able to **inhale at maximal effort.** The maximum of the triplicate readings for peak pressure drop was used to calculate the summary statistics for all inhalation endpoints by resistance setting  Instructions for exhalation were not provided |
| Sarinas et al251 (1998)  Financial support: research grant funded by Genentech, Inc. | Respiratory monitoring system (Medical Graphics 1070; Medical Graphics) | Yes | PIF was determined with and without added resistance. Three PIF maneuvers were performed against 4 resistive loads (16.0, 28.5, 67.1, and 212.7 Pa0.5 s/m3×103). The selected resistors bracketed the range of typical resistance values of commercially available DPIs  Each exercise consisted of a forced inspiratory breath through the resistor. Subjects were asked to **breathe normally and then to perform the maximum inspiratory maneuver from the end (resting) expiratory level** |
| Seheult et al.26 (2014a)  Financial support: HRB Ireland CSA Research Grant | Airtight container with Diskus® connected to Fleisch Pneumotachograph 6800 spirometer | Yes | Patients were instructed to **exhale gently to FRC and then inhale at the maximal flow rate and duration.** Each patient performed this maneuver until 2 consecutive PIF readings were within 20% of each other |
| Seheult et al.1 (2014b)  Financial support: HRB Ireland CSA Research Grant, Vitalograph Ltd, and GlaxoSmithKline Ltd | Airtight container with Diskus®, INCA™ acoustic recording device, and spirometer connection | Yes | Patients were instructed to **exhale gently to FRC and then inhale at the maximal flow rate and duration**. Each patient repeated this maneuver until 2 consecutive PIF readings were within 20% of each other |
| Virchow et al.27 (2014)  Financial support: Sandoz International GmbH and Vectura Delivery Devices Ltd | Forspiro® | Yes | Patients were divided into 2 groups. One group received only **limited written instructions**, which were, “use the study inhaler twice a day, every day for the full study period as follows: i) open the inhaler; ii) get a dose ready to inhale; iii) take a pretend inhalation (do not put the inhaler into your mouth); and iv) close the inhaler.” The other group was given **the fully illustrated Instructions for Use** |
| **PIF Measured Using In-Check™ DIAL or Other Devices** | | | |
| Al-Showair et al.28 (2007)  Financial support: Saudi Arabian Government | Modified In-Check™ meter (settings mimicked the resistance of the investigated inhalers [Diskus®, Turbuhaler®, and HandiHaler®]) | Yes | Patients studied the PIL for each inhaler and were informed that they should **inhale “as deep and hard as you can.”**  Patients performed 2 separate inhalations with the In-Check™ meter set for each inhaler, and the highest value was recorded  Mean resistances of Diskus®, Symbicort Turbuhaler®, Pulmicort Turbuhaler®, and HandiHaler® were 0.078, 0.110, 0.120, and 0.158 (cmH2O)0.5L/min respectively |
| Alsomali et al.29 (2017)  Financial support: none | PIF was measured using the In-Check™ DIAL set to match the patients’ prescribed DPIs | Yes | Participants were required to show their current inhaler technique to a trained assessor using a matching placebo DPI before receiving any inhaler education. If the participant’s technique of inhaler use was completely or partially incorrect, study participants were instructed to read the American College of Chest Physicians patient education  handout for the specific inhaler that they were prescribed and repeat their inhalation technique  PIF was measured 3 times for each participant, and the highest PIF value was reported. It was also noted whether the minimum PIF value for the prescribed device was achieved |
| Chen et al.30 (2020)  Financial support: not reported | PIFs were measured against  four-degrees of internal resistances (low, medium-low, medium, and medium-high) using the In-Check™ DIAL G16 | No | Not provided in the Methods section |
| de Koning et al.31 (2002)  Financial support: Groningen Centre for Drug Research | Inspiratory flow volume curves were recorded with the orifice disks connected to a pneumotachograph. Six different exchangeable orifice disks were used, with diameters increasing from 3 to 8 mm (R3–R8) | Yes | Inhalation characteristics were measured during inhalation through 3 out of the 6 available external resistances to airflow. Patients were allowed to **practice inhalation through the external resistance to airflow,** before the actual measurement  Inspiratory flow volume curves were measured with the **inhalation-instruction to inhale forcefully and deeply during a maximal inhalation**. During the measurements, all subjects were seated, wore a nose clip, and carried out their maximal inspiratory maneuvers from RV up to total lung capacity. From a series of 5 measurements through one orifice disk, the 3 highest flow values were taken if their variation was within 10%. If the last measurement was the highest of all 3, additional measurements were performed. Each effort was displayed on a monitor, and the subjects were coached to improve their effort  Assessments: PIF (liters per second), total inhalation time, time to PIF (time between the onset of inhalation at RV and the moment of reaching PIF)  Instructions for exhalation were not provided |
| Ding et al.32 (2021)  Financial support:  “Rising Stars of Medical Talent” Youth  Development Program-Youth Medical Talents –Clinical  Pharmacist Program; National Natural Science  Foundation of China (No. 81670016); Military  Construction Project of National Key Specialist-Clinical  Pharmacy | PIF was evaluated with the In-Check™ DIAL G16 against the resistance of the specific DPI that the patient was currently using:  High resistance: HandiHaler®  Medium resistance: Turbuhaler®  Medium-low resistance: Diskus® | Yes | The patient was required to simulate the daily inhalation process (“**as if using your inhaler**”) by using In-Check™ DIAL G16. The PIFs were measured 3 times and the maximum value was used to analyze whether the patient’s daily PIF was in the appropriate range corresponding to the instrument.  Patients were requested to demonstrate their use of the (drug-free) inhalers to evaluate the correctness of their inhalation technique by using a checklist jointly developed by the pharmacists and physicians according to the manufacturer’s recommendations of the 3 DPIs (HandiHaler®,  Turbuhaler®, and Diskus®) and reports in the published literature. Among  the steps, the step of “**breathe out completely,” “breathe in rapidly and deeply,” “hold breath,”** “breathe normally after holding breath,” and “repeat the inhalation if necessary” were the breathing-related steps. Two experienced pharmacists independently evaluated the specific steps according to the checklist, and any wrong step was recorded as an error. Each missed step was also considered an error. Any disagreement between the 2 pharmacists would be solved by discussion |
| Duarte et al.33 (2019)  Financial support: Clinical and Translational Science Award from the National Center for Advancing Translational Sciences, the Claude D. Pepper Older Americans Independence Center, and grants from the Agency for Healthcare Research and Quality | A respiratory therapist measured the PIF with an In-Check™ DIAL set to match the internal airflow resistance of Diskus® | Yes | Patients were seated with a nose clip and instructed to **exhale gently to FRC with a tight seal around the device followed by a rapid inhalation to maximal lung capacity. Patients were instructed to inhale as fast as possible and for as long as possible.** The maneuver was performed 3 times, and the highest measurement was recorded |
| Ghosh et al.34 (2019)  Financial support: none | PIF was measured using the In-Check™ DIAL G16 set to match the resistance of the patients’ prescribed DPIs.  R1: Breezhaler®,  Neohaler®  R2: Diskus®, Ellipta®  R3: Pressair®, Genuair®, Turbuhaler®  R4: Turbuhaler®, Twisthaler®  R5: HandiHaler® | No | Participants were asked to **inhale through the In-Check™ DIAL “as if using your inhaler.”** Participants did not receive any education on inhaler technique during the study. Measurements were collected in triplicate for each inhaler. Ample time was given between measurements to prevent fatigue  Instructions for exhalation were not provided |
| Harb et al.35 2020  Financial support: none | PIF measurements across all resistance ranges were obtained with the In-Check™ DIAL G16  R0 (no resistance): control  R1 (low resistance): Aerolizer®  R2 (low-medium resistance): Diskus®, Ellipta®  R3 (medium resistance): Turbuhaler®  R4 (medium-high resistance): NEXThaler®  R5 (high resistance): HandiHaler®, Easyhaler® | Yes | Participants were asked to inhale through the In-Check™ DIAL G16 “as **fast and hard as possible” after exhaling to their residual volume**. Considerable time (1 min) was given between measurements as guided by the American Thoracic Society. During this time, patients were advised to rest and breathe as comfortably as possible. Patients were not introduced to the next measurement unless this time interval was given and the patient was told that they were completely ready. Additional time intervals could be given if requested by any patient to prevent subsequent fatigue. All measurements were collected in triplicate and the highest value was recorded |
| Janssens et al.36 (2008)  Financial support: not reported | PIF related to different resistances corresponding to Turbuhaler®, Diskus®, and Aerolizer® was measured using the In-Check Inhaler Assessment Kit | No | The highest value of 3 attempts was recorded. All maneuvers were executed and encouraged by trained technicians under the supervision of medical staff  Instructions for exhalation were not provided |
| Jarvis et al.37 (2007)  Financial support: none | In-Check™ DIAL was used to measure PIF against the simulated internal resistance of Turbuhaler®, Accuhaler®, and Diskhaler® | No | The same investigator tested all the patients with the In-Check™ DIAL. The order of the resistances was randomized. Three measurements from FRC with the patient seated were recorded for each resistance. In each case, all 3 readings were within 5% of each other, showing good reproducibility, with the best reading recorded |
| Kawamatawong et al.38 (2017)  Financial support: not reported | Measurements of PIF for Accuhaler® and Turbuhaler® were performed using the In-Check™ DIAL | Yes | A total of 3 consecutive measurements of PIF were performed for each inhaler following **previously published instructions for measurement**, and the average values were reported. The sequence of measuring PIF by In-Check™ DIAL was started with nonresistant mode, followed by Accuhaler® and Turbuhaler®. Instructions for exhalation were not provided |
| Loh et al.39 (2017)  Financial support: not reported | PIF measurement was performed with the In-Check™ DIALby 4 trained respiratory therapists | Yes | In the seated position, patients were told to **inhale from FRC** **as fast and as hard as they could into the In-Check™ DIAL**, and the best of 3 efforts was taken  Instructions for exhalation were not provided |
| Mahler et al.40 (2013)  Financial support: grant from Sunovion Pharmaceuticals Inc. | In-Check™ DIAL was used to measure PIF against the simulated internal resistance of Diskus® | Yes | Patients performed 3 PIF maneuvers with the In-Check™ DIAL at RV against no resistance and 3 PIF maneuvers against simulated internal resistance of Diskus®. Each patient was instructed **to inhale ‘‘as quickly as possible’’ with the In-Check™ DIAL after a complete exhalation**. The highest PIF value for each patient was used for analysis |
| Mahler et al.41 (2014)  Financial support: grant from Sunovion Pharmaceuticals Inc. | In-Check™ DIAL was used to measure PIF against the simulated internal resistance of  Diskus® | Yes | Each patient was familiarized with the inhalational technique for salmeterol Diskus® per instructions in the package insert: before inhaling your dose from the Diskus®, **breathe out (exhale) fully** while holding the Diskus® level and away from your mouth. Remember, never breathe out into the Diskus® device. Put the mouthpiece to your lips. **Breathe in quickly and deeply through** the Diskus®. Do not breathe in through your nose. Remove the Diskus® from your mouth. Hold your breath for about 10 seconds, or for as long as is comfortable. Breathe out slowly  PIF was measured to determine eligibility (inclusion criteria: <60 L/min) |
| Mahler et al.42 (2019)  Financial support: Theravance Biopharma,  Ireland Limited Inc. | PIF was assessed using In-Check™ DIAL with resistance  set to Diskus® and HandiHaler® | Yes | Patients were instructed to **exhale completely**, place the mouthpiece of the device into their mouths, and **inhale forcefully and as deeply as possible** to quantify the PIF; final values were recorded as the  maximum of 3 sequential measurements |
| Melani et al.43 (2005)  Financial support: none | In-Check™ DIAL was used to measure PIF through Turbuhaler® and Diskus® | Yes | Inhalation technique of patients using the inhalers they use at home was observed by trained investigators and reported in accordance with a preliminary defined step-by-step checklist for each inhaler. The inhalation was classified as “**forceful” or “weak”** based on the judgment of the observer. Patients were asked about the instructions they had been given regarding appropriate use of the inhaler, such as who gave the instructions, what the instructions encompassed, how much time was spent on education, and whether their inhalation technique was periodically rechecked  Patients **repeated the same inspiratory effort through the inhaler** using the In-Check™ DIAL set to the corresponding resistance of the inhaler used in the presence of another investigator, blinded to the previous direct observation of inhalation technique. Three PIF measurements were taken, and the best was recorded. **Patients with a weak inhalation or suboptimal PIF received instruction on more forceful inspiratory effort,** and another measurement was taken through the In-Check™ DIAL  Instructions for exhalation were not provided |
| Price et al.44 (2018)  Financial support: AstraZeneca | PIF was assessed using In-Check™ DIAL set to simulate the resistance of Aerolizer®, Diskus®, Turbuhaler®, and HandiHaler® | Yes | PIF measurements were obtained by resident doctors on the day of discharge of patients hospitalized for a COPD exacerbation. Patients were instructed to breathe in **“fast and hard”** through the device following **exhalation to RV**, and the best PIF out of 3 consecutive measurements was recorded |
| Quinet et al.45 (2010)  Financial support: none | PIF was assessed using In-Check™ DIAL. Handihaler® and Aerolizer® were used | Yes | Patients were trained on the inhalation technique once daily, for 3 consecutive days by physiotherapists using an inhaler device with placebo capsules. Patients were then asked to reproduce the entire sequence of events. The same physiotherapist then evaluated the patient’s technique after the third session. Patients were seated without support and inhalation was started from the RV |
| Represas-Represas et al.46 (2020)  Financial support: none | PIF was assessed using In-Check™ DIAL G16 set to simulate the resistance of the prescribed inhalers:  R1 (low resistance): Breezhaler®  R2 (medium-low resistance): Accuhaler®, Diskhaler®, Ellipta®  R3 (medium resistance): Turbuhaler S®, Genuair®, Spiromax®, Clickhaler®  R4 (medium-high resistance): NEXThaler® Turbuhaler®, Twisthaler®, Easyhaler C®  R5 (high resistance): HandiHaler®, Easyhaler M® | No | Once the inhaler to be tested had been selected and the In-Check DIAL G16® device set-up accordingly, the patient inhaled through a  mouthpiece, simulating their normal inhalations through the inhaler |
| Sharma et al.47 (2017)  Financial support: Sunovion Pharmaceuticals, Inc. | In-Check™ DIAL set to simulate the resistance of Diskus® | Yes | Patients made 3 PIF attempts, and study coordinators instructed each patient to **inhale as quickly as possible with the In-Check™ DIAL after a complete exhalation**. The highest PIF value for each enrolled patient was recorded and used for analysis |
| Terzano and Oriolo48 (2017)  Financial support: not reported | In-Check™ DIAL set to simulate the resistance of Turbuhaler®, NEXThaler®, and Diskus® | No | All maneuvers were executed under the supervision of a well-trained lung function assistant. The highest value from 3 attempts was recorded for each parameter |
| Weiner and Weiner49 (2006)  Financial support: not reported | In-Check™ DIAL set to simulate the resistance of Turbuhaler® and Diskus® | No | Patients inhaled through the device set for both Diskus® and  Turbuhaler® resistances in a randomized manner on 2 consecutive days. For each resistance, 3 attempts were measured each day,  and the highest value of 6 attempts was recorded for each resistance |

**Abbreviations:** COPD, chronic obstructive pulmonary disease; DPI, dry powder inhaler; FRC, functional residual capacity; IPR, inhalation profile recorder; KPNW, Kaiser Permanente Northwest; PIF, peak inspiratory flow; PIL, patient information leaflet; RV, residual volume.

*Hamilton M et al. *J Aerosol Med Pulm Drug Deliv*. 2015;28(6):498–506.

**Supplementary Table 2: Measurement of PIF Using Inhalers or In-Check™ DIAL in Published Studies**

| **Study** | **Threshold for Optimal and/or Suboptimal PIF** | **Mean (SD)/(Range) PIF and ACC** |
| --- | --- | --- |
| **PIF Measured Using a Modified Inhaler and/or an Inhalation Profile Recorder** | | |
| Abadelah et al.4 (2019)  Financial support: not reported | Because the Andersen Cascade Impactor—used to measure aerodynamic characteristics of the emitted dose—is calibrated to work at a maximum PIF of 90 L/min, profiles with a PIF >89 L/min were not included in the study | PIF: 64.9 (18.9) L/min  ACCa: 4.2 L/s2 |
| Altman et al.5 (2018)  Financial support: Novartis Pharma AG | Not provided | PIF:  Breezhaler®: 108.0 (23.0)b L/min  Ellipta®:78.0 (15.0)b L/min  HandiHaler®: 49.0 (9)b L/min |
| Anderson et al. 20216  Financial support: GlaxoSmithKline | Spirometric PIF ≥50 L/min was estimated to be equivalent to a lower 90%/95% bound Ellipta PIF ≥30 L/min | Spirometric PIF:  Pooled clinical trials: 199.1 (78.6) L/min  KPNW database: 230.2 (89.7) L/min |
| Azouz et al.7 (2015a)  Financial support: not reported | Not provided | PIF:  Aerolizer®: 81.8 (25.4) L/min  Diskus®: 62.0 (22.4) L/min  Easyhaler®: 49.6 (15.0) L/min  Turbuhaler®: 50.9 (15.3) L/min  ACC:  Aerolizer®: 8.7 (6.8) kPa/s  Diskus®: 6.7 (7.3) kPa/s  Easyhaler®: 10.7 (6.9) kPa/s  Turbuhaler®: 8.5 (6.7) kPa/s |
| Azouz et al.8 (2015b)  Financial support: Teva Pharmaceuticals | Not provided | PIF:  Turbuhaler®: 50.1 (16.2) L/min  Spiromax®: 57.5 (21.0) L/min  ACC:  Turbuhaler®: 8.4 (9.5) kPa/s  Spiromax®: 11.0 (12.8) kPa/s |
| Broeders et al.9 (2001)  Financial support: GlaxoSmithKline, Zeist, The Netherlands | Not provided | PIF:  Turbuhaler®: 76.1 (13.8) L/min  Diskus®: 108.3 (20.4) L/min |
| Broeders et al.10 (2003)  Financial support: GlaxoSmithKline, Zeist, The Netherlands | Optimal: >60 L/min  Minimum required: >30 L/min | PIF:  Turbuhaler®: (before, after instructions)  Mild COPD: 76.0 (4.6), 85.4 (2.2) L/min  Moderate COPD: 64.9 (4.9), 84.4 (2.7) L/min  Severe COPD: 68.6 (4.1), 73.3 (4.1) L/min  Diskus®: (before, after instructions)  Mild COPD: 107.8 (7.2), 124.0 (2.8) L/min  Moderate COPD: 91.8 (6.8), 121.3 (3.0) L/min  Severe COPD: 95.9 (6.3), 103 (6.4) L/min |
| Broeders et al.11 (2005)  Financial support: GlaxoSmithKline, Zeist, The Netherlands | Not provided | PIF:  Turbuhaler®: 69.2 (19.3) L/min  Diskus®: 100.1 (30.8) L/min |
| Cegla12 (2004)  Financial support: not reported | Not provided | PIF:  Turbuhaler®: 54.3 (16.8) L/min  Novolizer®: 79.8 (19.2) L/min |
| Chetta et al.13 (2021)  Financial support: Chiesi Farmaceutici SpA | NEXThaler®: breath-actuated mechanism firing of 35 L/min is required for inspiratory flow | PIF:  First inhalation: 68.0 (18.4) L/min  Second inhalation: 67.6 (17.9) L/min |
| Chodosh et al.14 (2001)  Financial support: not reported.  Some authors are employees of Boehringer Ingelheim | Not provided | Median PIF: 30.0 L/min |
| Farkas et al.15 (2019)  Financial support:  Bolyai János Scholarship  of the Hungarian Academy of Sciences | Breezhaler®: 50 L/minc  Genuair®: 40 L/minc  Turbuhaler®: 30 L/min or 60 L/minc | Breezhaler®: 91.4 (32.5) L/min  Genuair®: 75.1 (24.2) L/min  Turbuhaler®: 77.5 (30.4) L/min |
| Hira et al.16 (2018)  Financial support: Hitachi Automotive Systems, Ltd provided support in the form of salaries for authors | The essential criterion of optimal inhalation pattern was higher than the lower limit of PIF for each inhaler in order to disperse dry powder from the inhaler.  Optimal:  >60 L/min (Diskhaler®)c  >50 L/min (Breezhaler®)c  >45 L/min (Jenuair®)c  >30 L/min (Diskus®, Ellipta®, Turbuhaler®, and Twisthaler®)c  >20 L/min (Twincaps®, Clickhaler®, HandiHaler®, and Swinghaler®) | Not available |
| Jõgi et al.17 (2021)  Financial support: Orion Corporation, Espoo, Finland | Optimal:c  Easyhaler®: 30 L/min  HandiHaler®: 30 L/min | PIF  Standard Easyhaler®: 58.4 (35.7–77.3) L/min  Center slot Easyhaler®: 68.2 (48.8–89.9) L/min  HandiHaler®: 49.5 (29.9–73.1) L/min |
| Magnussen et al.18 (2009)  Financial support: Almirall, Barcelona, Spain | Genuair®: ≥45 L/minc | PIF (average):  Genuair®: 92.0 (15.4) L/min  HandiHaler®: 46.1 (9.6) L/min |
| Malmberg et al.19 (2010)  Financial support: Unrestricted research grant from Orion Corporation, Espoo, Finland | Minimum PIF for effective use of Easyhaler®: 28 L/min | PIF: 54 L/min |
| Malmberg et al.20 (2014)  Financial support: Orion Pharma | Not provided | PIF:  Easyhaler®: 55.8 (13.0) L/min  Turbuhaler®: 72.1 (15.1) L/min |
| Malmberg et al.21 (2021)  Financial support: Orion Pharma | Easyhaler®: ≥30 L/min was required for consistent dose delivery | PIF:  Easyhaler®: 61.9 (13.2) L/min |
| Negro et al.22 (2001)  Financial support: not reported.  One author is an employee of Chiesi Farmaceutici S.p.A. | Not provided, but 25 L/min was deemed adequate for drug delivery | PIF:  Pulvinal™: 48.5 (12.8) L/min  Turbohaler™: 56.4 (15.4) L/min |
| Pavkov et al.23 (2010)  Financial support: Novartis | Not provided; however, the majority (96%) of patients reported PIF ≥60 L/min, and in vitro data were generated for patients with PIF <50 and ≥50 L/min | PIF:  Breezhaler®: 84 to 103 L/min |
| Prime et al.24 (2015)  Financial support: GlaxoSmithKline | Not provided | PIF:  With single strip: 67.5 to 101.9 L/min  With 2-strip: 66.3 to 95.7 L/min |
| Sarinas et al.25 (1998)  Financial support: research grant funded by Genentech, Inc. | Not provided | PIF:  Severe COPD: 3.98 m3/s1×10-3  Moderate COPD: 4.03 m3/s1×10-3  Mild COPD: 6.82 m3/s1×10-3  Normal: 5.51 m3/s1×10-3 |
| Seheult et al.26 (2014a)  Financial support: HRB Ireland CSA Research Grant | Optimal: ≥60 L/min  Suboptimal: <60 L/min  Minimum required: 30 L/min | PIF: 49.4 (15.68) L/min |
| Seheult et al.1 (2014b)  Financial support: HRB Ireland CSA Research Grant, Vitalograph Ltd, and GlaxoSmithKline Ltd | Optimal: >30 L/min, or ideally >60 L/minc | PIF: 155.5 (66.0) L/min |
| Virchow et al.27 (2014)  Financial support: Sandoz International GmbH and Vectura Delivery Devices Ltd | Minimum acceptable PIF: 30 L/min | PIF: ≥35 L/min |
| **PIF Measured Using In-Check™ DIAL or Other Devices** | | |
| Al-Showair et al.28 (2007)  Financial support: Saudi Arabian Government | Not provided, but assessments were done at 30 and 60 L/min (optimal PIF for DPIs stated as ≥30 L/minc) | PIF:  Turbuhaler®: 45.9 (14.1) L/min  Diskus®: 57.5 (17.9) L/min  HandiHaler®: 28.6 (10.0) L/min |
| Alsomali et al.29 (2017)  Financial support: none | Not provided | Not reported |
| Chen et al.30 (2020)  Financial support: not reported | Low-resistance devicec  Excessive: ≥100 L/min  Optimal: 50–99 L/min  Suboptimal: 30–49 L/min  Insufficient: <30 L/min  Other devices:c  Excessive: >90 L/min  Optimal: 60–89 L/min  Suboptimal: 30–59 L/min  Insufficient: <30 L/min | Median (range) PIF based on resistance:  Medium-high resistance: 63 (21–98) L/min  Medium resistance: 71 (25–103) L/min  Medium-low resistance: 80 (26–116) L/min  Low resistance: 97 (34–150) L/min |
| de Koning et al.31 (2002)  Financial support: Groningen Centre for Drug Research | Not provided | PIF: 5.60 (1.86) L/s |
| Ding et al.32 (2021)  Financial support:  “Rising Stars of Medical Talent” Youth  Development Program-Youth Medical Talents –Clinical Pharmacist Program; National Natural Science Foundation of China (No. 81670016); Military  Construction Project of National Key Specialist-Clinical Pharmacy | Below minimum:  HandiHaler®: <20 L/min  Turbuhaler®: <30 L/min  Diskus®: <30 L/min  Suboptimal:  HandiHaler®: <30 L/min  Turbuhaler®: <60 L/min  Diskus®: <60 L/min | Not reported |
| Duarte et al.33 (2019)  Financial support: Clinical and Translational Science Award from the National Center for Advancing Translational Sciences, the Claude D. Pepper Older Americans Independence Center, and grants from the Agency for Healthcare Research and Quality | Optimal: >60 L/min  Suboptimal: <60 L/min | Not reported |
| Ghosh et al.34 (2019)  Financial support: none | Discordant: <60 L/min for R2 inhaler or <30 L/min for R5 inhaler  Concordant: >60 L/min for R2 inhaler or >30 L/min for R5 inhaler | Median PIF at R2: 64 L/min; R5: 36 L/min |
| Harb et al.35 (2020)  Financial support: none | Optimal:c  R1, Aerolizer®: ≥65 L/min  R2, Ellipta®, Diskus®: ≥60 L/min  R3, Turbuhaler®: ≥60 L/min  R4, NEXThaler®: ≥35 L/min  R5, HandiHaler®, Easyhaler®:≥30 L/min  Suboptimal:c  R1, Aerolizer®: <65 L/min  R2, Ellipta®, Diskus®: <60 L/min  R3, Turbuhaler®: <60 L/min  R4, NEXThaler®: <35 L/min  R5, HandiHaler®, Easyhaler®:<30 L/min | PIF:  R1: 79.19 (19.24) L/min  R2: 66.78 (15.65) L/min  R3: 59.61 (14.22) L/min  R4: 52.64 (12.73) L/min  R5: 41.56 (10.90) L/min |
| Janssens et al.36 (2008)  Financial support: not reported | Optimal: >60 L/minc  Suboptimal: <30 L/minc  Arbitrary cutoff: 45 L/min | PIF: 169 (66) L/min |
| Jarvis et al.37 (2007)  Financial support: none | Accuhaler®: ≥30 L/min  Turbuhaler®: ≥60 L/minc  Autohaler®: ≥30 L/min | Accuhaler®: 63 (20) L/min  Turbohaler®: 44 (19) L/min  Autohaler®: 58 (18) L/min |
| Kawamatawong et al.38 (2017)  Financial support: not reported | Suboptimal: <60 L/minc | PIF at age >60 years:  Turbuhaler®: 72.5 (18.9) L/min  Accuhaler®: 93.8 (22.9) L/min  PIF at age ≤60 years:  Turbuhaler®: 82.5 (21.1) L/min  Accuhaler®: 99.5 (24.3) L/min |
| Loh et al.39 (2017)  Financial support: not reported | Suboptimal: ≤60 L/min against no resistance | PIF: 66.3 (26.0) L/min |
| Mahler et al.40 (2013)  Financial support: grant from Sunovion Pharmaceuticals Inc. | Optimal: ≥60 L/minc | PIF: 71.4 (18.1) L/min |
| Mahler et al.41 (2014)  Financial support: grant from Sunovion Pharmaceuticals Inc. | Optimal: ≥60 L/min against the internal resistance of the particular DPIc  Suboptimal: <60 L/minc | PIF: 53.3 (5.0) L/min |
| Mahler et al.42 (2019)  Financial support: Theravance Biopharma and Ireland Limited Inc. | Optimal:  Diskus®: ≥60 L/minc  HandiHaler®. ≥40 L/minc | PIF (baseline): 45(12) L/min |
| Melani et al.43 (2005)  Financial support: none | Optimal: >60 L/minc  Minimally effective: ≥30 L/min | PIF: <30 to >60 L/min |
| Price et al.44 (2018)  Financial support: AstraZeneca | Suboptimal:c  Aerolizer®: <60 L/min  Diskus®: <60 L/min  Turbohaler®: <60 L/min  HandiHaler®: <30 L/min | Not reported: association with spirometric and other variables were noted |
| Quinet et al.45 (2010)  Financial support: none | Not provided | 13 of 15 patients had PIF ≥120 L/min |
| Represas-Represas et al.46 (2020)  Financial support: none | Optimal:c  R1 to R4: 60 L/min  R5: 30 L/min | PIF:  R1: 95 (21) L/min  R2: 74 (18) L/min  R3: 74 (19) L/min  R4: 62 (14) L/min  R5: 40 (12) L/min |
| Sharma et al.47 (2017)  Financial support: Sunovion Pharmaceuticals, Inc. | Optimal: ≥60 L/minc  Cutoff for low/normal: 60 L/min | PIF: 71 (22.12) L/min |
| Terzano and Oriolo48 (2017)  Financial support: not reported | Optimal  Turbuhaler®: 60 L/min  NEXThaler®: 50 L/min  Diskus®: 40 L/min | PIF:  Turbuhaler®: 102 (7.2) L/min  NEXThaler®: 108 (7.9) L/min  Diskus®: 104 (8.8) L/min |
| Weiner and Weiner49 (2006)  Financial support: not reported | Optimal  Turbuhaler®: ≥60 L/min  Minimum:  Diskus®: 30 L/min | PIF after training:  Turbuhaler®: 68.6 (3.2)b L/min  Diskus®: 79.1 (3.6)b L/min |

**Notes:** aACC was determined by calculating the slope of the flow values against the inhalation time. The value with a high linear regression (R2) was chosen. For Onbrez Breezhaler®, the linear regression was almost R2=1 for all values; therefore, the ACC was determined as the value with a high slope.

bStandard error.

cBased on previous publications.

**Abbreviations:** ACC, acceleration rate; COPD, chronic obstructive pulmonary disease; DPI, dry powder inhaler; KPNW, Kaiser Permanente Northwest; PIF, peak inspiratory flow; SD, standard deviation.

**References**

1. Seheult JN, O'Connell P, Tee KC, et al. The acoustic features of inhalation can be used to quantify aerosol delivery from a Diskus™ dry powder inhaler. *Pharm Res.* 2014;31(10):2735–2747.

2. Chrystyn H, Audibert R, Keller M, Quaglia B, Vecellio L, Roche N. Real-life inhaler adherence and technique: time to get smarter! *Respir Med.* 2019;158:24–32.

3. Bodini R, Grinovero M, Corsico A, et al. Digital therapy in the treatment of asthma and COPD - epidemiology of development and use of an emerging health technology in respiratory medicine. *Eur Respir J.* 2019;54 (suppl 63):PA735.

4. Abadelah M, Chrystyn H, Larhrib H. Use of inspiratory profiles from patients with chronic obstructive pulmonary disease (COPD) to investigate drug delivery uniformity and aerodynamic dose emission of indacaterol from a capsule based dry powder inhaler. *Eur J Pharm Sci.* 2019;134:138–144.

5. Altman P, Wehbe L, Dederichs J, et al. Comparison of peak inspiratory flow rate via the Breezhaler®, Ellipta® and HandiHaler® dry powder inhalers in patients with moderate to very severe COPD: a randomized cross-over trial. *BMC Pulm Med.* 2018;18:100.

6. Anderson M, Collison K, Drummond MB, et al. Peak inspiratory flow rate in COPD: an analysis of clinical trial and real-world data. *Int J Chron Obstruct Pulmon Dis*. 2021;16:933–943.

7. Azouz W, Chetcuti P, Hosker HSR, Saralaya D, Stephenson J, Chrystyn H. The inhalation characteristics of patients when they use different dry powder inhalers. *J Aerosol Med Pulm Drug Deliv.* 2015;28(1):35–42.

8. Azouz W, Chetcuti P, Hosker HSR, Saralaya D, Chrystyn H. Inhalation characteristics of asthma patients, COPD patients and healthy volunteers with the Spiromax® and Turbuhaler® devices: a randomised, cross-over study. *BMC Pulm Med.* 2015;15:47.

9. Broeders ME, Molema J, Vermue NA, Folgering HT. Peak inspiratory flow rate and slope of the inhalation profiles in dry powder inhalers. *Eur Respir J.* 2001;18(5):780–783.

10. Broeders MEAC, Molema J, Hop WCJ, Folgering HTM. Inhalation profiles in asthmatics and COPD patients: reproducibility and effect of instruction. *J Aerosol Med.* 2003;16(2):131–141.

11. Broeders ME, Molema J, Burnell PK, Folgering HT. Ventolin Diskus and Inspyril Turbuhaler: an in vitro comparison. *J Aerosol Med.* 2005;18(1):74–82.

12. Cegla UH. Pressure and inspiratory flow characteristics of dry powder inhalers. *Respir Med.* 2004;98 Suppl A:S22–28.

13. Chetta A, Yorgancioglu A, Scuri M, Barile S, Guastalla D, Dekhuijzen PNR. Inspiratory flow profile and usability of the NEXThaler, a multidose dry powder inhaler, in asthma and COPD. *BMC Pulm Med.* 2021; 21(1):65.

14. Chodosh S, Flanders JS, Kesten S, Serby CW, Hochrainer D, Witek TJ, Jr. Effective delivery of particles with the HandiHaler dry powder inhalation system over a range of chronic obstructive pulmonary disease severity. *J Aerosol Med.* 2001;14(3):309–315.

15. Farkas A, Szipocs A, Horvath A, et al. Establishment of relationships between native and inhalation device specific spirometric parameters as a step towards patient tailored inhalation device selection. *Respir Med.* 2019;154:133–140.

16. Hira D, Koide H, Nakamura S, et al. Assessment of inhalation flow patterns of soft mist inhaler co-prescribed with dry powder inhaler using inspiratory flow meter for multi inhalation devices. *PLoS One.* 2018;13(2):e0193082.

17. Jõgi R, Mattila L, Vahteristo M, et al. Inspiratory flow parameters through dry powder inhalers in healthy volunteers and patients with chronic obstructive pulmonary disease (COPD): device resistance does not limit use in COPD. *Int J Chron Obstruct Pulmon Dis.* 2021;16:1193–1201.

18. Magnussen H, Watz H, Zimmermann I, et al. Peak inspiratory flow through the Genuair inhaler in patients with moderate or severe COPD. *Respir Med.* 2009;103(12):1832–1837.

19. Malmberg LP, Rytila P, Happonen P, Haahtela T. Inspiratory flows through dry powder inhaler in chronic obstructive pulmonary disease: age and gender rather than severity matters. *Int J Chron Obstruct Pulmon Dis.* 2010;5:257–262.

20. Malmberg LP, Everard ML, Haikarainen J, Lähelmä S. Evaluation of in vitro and in vivo flow rate dependency of budesonide/formoterol Easyhaler®. *J Aerosol Med Pulm Drug Deliv.* 2014;27(5):329–340.

21. Malmberg LP, Pelkonen AS, Vartiainen V, Vahteristo M, Lähelmä S, Jõgi R. Patients with asthma or chronic obstructive pulmonary disease (COPD) can generate sufficient inspiratory flows via Easyhaler® dry powder inhaler: a pooled analysis of two randomized controlled trials. *J Thorac Dis*. 2021;13(2):621–631.

22. Negro RD, Micheletto C, Tognella S, Clayton N, Cantini L, Woodcock A. Evidence of adequacy of the performance of the Pulvinal by measuring through-device peak inspiratory flow rate in severe airways obstruction in adults and children. *J Aerosol Med.* 2001;14(3):343–349.

23. Pavkov R, Mueller S, Fiebich K, et al. Characteristics of a capsule based dry powder inhaler for the delivery of indacaterol. *Curr Med Res Opin.* 2010;26(11):2527–2533.

24. Prime D, de Backer W, Hamilton M, et al. Effect of disease severity in asthma and chronic obstructive pulmonary disease on inhaler-specific inhalation profiles through the ELLIPTA® dry powder inhaler. *J Aerosol Med Pulm Drug Deliv.* 2015;28(6):486–497.

25. Sarinas PS, Robinson TE, Clark AR, Canfield J, Jr., Chitkara RK, Fick RB, Jr. Inspiratory flow rate and dynamic lung function in cystic fibrosis and chronic obstructive lung diseases. *Chest.* 1998;114(4):988–992.

26. Seheult JN, Costello S, Tee KC, et al. Investigating the relationship between peak inspiratory flow rate and volume of inhalation from a DiskusTM Inhaler and baseline spirometric parameters: a cross-sectional study. *Springerplus.* 2014;3:496.

27. Virchow JC, Weuthen T, Harmer QJ, Jones S. Identifying the features of an easy-to-use and intuitive dry powder inhaler for asthma and chronic obstructive pulmonary disease therapy: results from a 28-day device handling study, and an airflow resistance study. *Expert Opin Drug Deliv.* 2014;11(12):1849–1857.

28. Al-Showair RAM, Tarsin WY, Assi KH, Pearson SB, Chrystyn H. Can all patients with COPD use the correct inhalation flow with all inhalers and does training help? *Respir Med.* 2007;101(11):2395–2401.

29. Alsomali HJ, Vines DL, Stein BD, Becker EA. Evaluating the effectiveness of written dry powder inhaler instructions and health literacy in subjects diagnosed with COPD. *Respir Care.* 2017;62(2):172–178.

30. Chen SY, Huang CK, Peng HC, Yu CJ, Chien JY. Inappropriate peak inspiratory flow rate with dry powder inhaler in chronic obstructive pulmonary disease. *Sci Rep.* 2020;10(1):7271.

31. de Koning JP, van der Mark TW, Coenegracht PMJ, Tromp TFJ, Frijlink HW. Effect of an external resistance to airflow on the inspiratory flow curve. *Int J Pharm.* 2002;234(1-2):257u–266.

32. Ding N, Zhang W, Wang Z, et al. Prevalence and associated factors of suboptimal daily peak inspiratory flow and technique misuse of dry powder inhalers in outpatients with stable chronic airway diseases. *Int J Chron Obstruct Pulmon Dis.* 2021;16:1913–1924.

33. Duarte AG, Tung L, Zhang W, Hsu ES, Kuo YF, Sharma G. Spirometry measurement of peak inspiratory flow identifies suboptimal use of dry powder inhalers in ambulatory patients with COPD. *Chronic Obstr Pulm Dis.* 2019;6(3):246–255.

34. Ghosh S, Pleasants RA, Ohar JA, Donohue JF, Drummond MB. Prevalence and factors associated with suboptimal peak inspiratory flow rates in COPD. *Int J Chron Obstruct Pulmon Dis.* 2019;14:585–595.

35. Harb HS, Laz NI, Rabea H, Abdelrahim MEA. Prevalence and predictors of suboptimal peak inspiratory flow rate in COPD patients. Eur J Pharm Sci. 2020;147:105298.

36. Janssens W, VandenBrande P, Hardeman E, et al. Inspiratory flow rates at different levels of resistance in elderly COPD patients. *Eur Respir J.* 2008;31(1):78–83.

37. Jarvis S, Ind PW, Shiner RJ. Inhaled therapy in elderly COPD patients; time for re-evaluation? *Age Ageing.* 2007;36(2):213–218.

38. Kawamatawong T, Khiawwan S, Pornsuriyasak P. Peak inspiratory flow rate measurement by using In-Check DIAL for the different inhaler devices in elderly with obstructive airway diseases. *J Asthma Allergy.* 2017;10:17–21.

39. Loh CH, Peters SP, Lovings TM, Ohar JA. Suboptimal inspiratory flow rates are associated with chronic obstructive pulmonary disease and all-cause readmissions. *Ann Am Thorac Soc.* 2017;14(8):1305–1311.

40. Mahler DA, Waterman LA, Gifford AH. Prevalence and COPD phenotype for a suboptimal peak inspiratory flow rate against the simulated resistance of the Diskus® dry powder inhaler. *J Aerosol Med Pulm Drug Deliv.* 2013;26(3):174–179.

41. Mahler DA, Waterman LA, Ward J, Gifford AH. Comparison of dry powder versus nebulized beta-agonist in patients with COPD who have suboptimal peak inspiratory flow rate. *J Aerosol Med Pulm Drug Deliv.* 2014;27(2):103–109.

42. Mahler DA, Ohar JA, Barnes CN, Moran EJ, Pendyala S, Crater GD. Nebulized versus dry powder long-acting muscarinic antagonist bronchodilators in patients with COPD and suboptimal peak inspiratory flow rate. *Chronic Obstr Pulm Dis.* 2019;6(4).

43. Melani AS, Bracci LS, Rossi M. Reduced peak inspiratory effort through the Diskus® and the Turbuhaler® due to mishandling is common in clinical practice. *Clin Drug Investig.* 2005;25(8):543–549.

44. Price DB, Yang S, Ming SWY, et al. Physiological predictors Of peak inspiRatory flow using Observed lung function resultS (POROS): evaluation at discharge among patients hospitalized for a COPD exacerbation. *Int J Chron Obstruct Pulmon Dis.* 2018;13:3937–3946.

45. Quinet P, Young CA, Heritier F. The use of dry powder inhaler devices by elderly patients suffering from chronic obstructive pulmonary disease. *Ann Phys Rehabil Med.* 2010;53(2):69–76.

46. Represas-Represas C, Aballe-Santos L, Fernández-García A, et al. Evaluation of suboptimal peak inspiratory flow in patients with stable COPD. *J Clin Med*. 2020, 9(12):3949.

47. Sharma G, Mahler DA, Mayorga VM, Deering KL, Harshaw O, Ganapathy V. Prevalence of low peak inspiratory flow rate at discharge in patients hospitalized for COPD exacerbation. *Chronic Obstr Pulm Dis.* 2017;4(3):217–224.

48. Terzano C, Oriolo F. Lung characteristics in elderly males and females patients with COPD: differences and optimal use of dry powder inhalers (DPIs). *Eur Rev Med Pharmacol Sci.* 2017;21(11):2708–2716.

49. Weiner P, Weiner M. Inspiratory muscle training may increase peak inspiratory flow in chronic obstructive pulmonary disease. *Respiration.* 2006;73(2):151–156.
